# Supplementary material for: Persistent COVID-19 Symptoms at 6 Months After Onset and the Role of Vaccination Before or After SARS-CoV-2 Infection
Source: PubMed Central journal article supplement (PMC9857077; doi:10.1001/jamanetworkopen.2022.51360), 2023-01-18
Supplement: jamanetwopen-e2251360-s001.pdf [file jamanetwopen-e2251360-s001.pdf]

## Supplementary Online Content

Richard SA, Pollett SD, Fries AC, et al; Epidemiology, Immunology, and Clinical Characteristics of Emerging Infectious Diseases With Pandemic Potential (EPICC) COVID-19 Cohort Study Group. Persistent COVID-19 symptoms at 6 months after onset and the role of vaccination before or after SARS-CoV-2 infection. *JAMA Netw Open*. 2023;6(1):e2251360. doi:10.1001/jamanetworkopen.2022.51360

**eFigure 1.** Flow Chart of Inclusion in the Analyses of EPICC Cohort Participants

**eFigure 2.** Specific Diagnoses in EPICC Participants' Health Records From 90 Days Prior to 180 After SARS-CoV-2 Diagnosis

**eTable 1.** Schedule of Specimen and Data Collection for Participants Enrolled in the EPICC Cohort Study

**eTable 2.** *ICD-10* Categories Used to Categorize Medical Diagnoses

**eTable 3.** Risk of Organ-Specific Diagnoses Derived From Generalized Linear Models Run Using Each Organ System Category as the Outcome

**eTable 4.** Comparison of Those Who Were and Were Not Included in the Analysis Based on Availability of Survey and Military Health System Repository Data

This supplementary material has been provided by the authors to give readers additional information about their work.

eFigure 1. Flow chart of inclusion in the analyses of EPICC cohort participants.

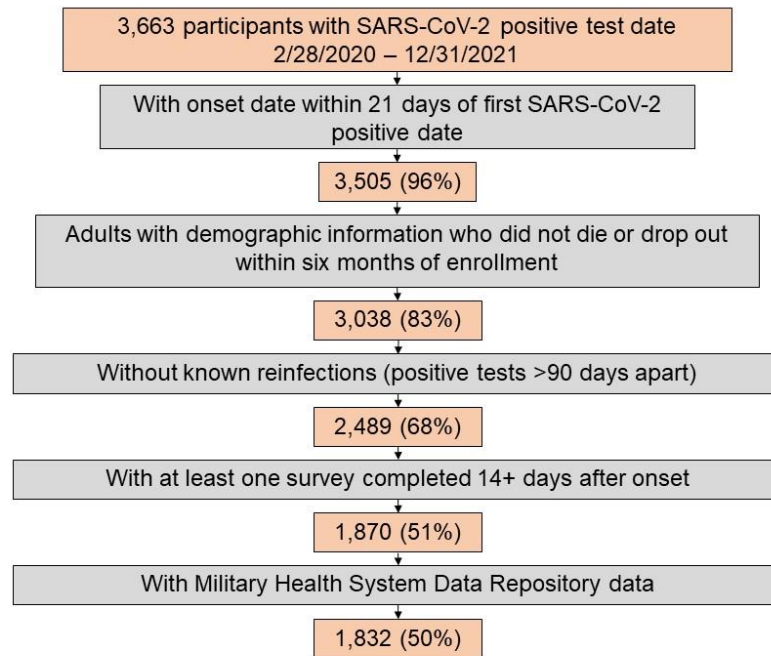

eFigure 2. Specific diagnoses in EPICC participants' health records from 90 days prior to 180 after SARS-CoV-2 diagnosis.

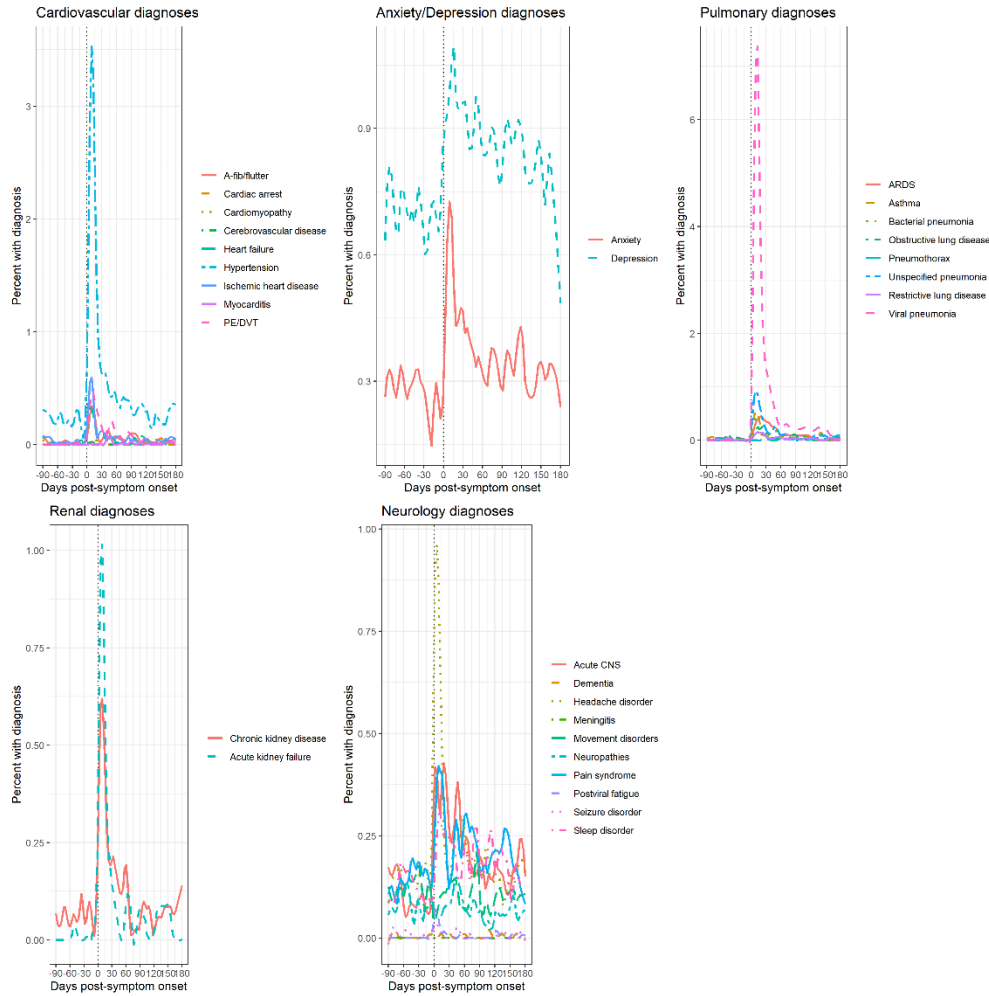

eTable 1. Schedule of specimen and data collection for participants enrolled in the EPICC cohort study (H=hospitalized Military Treatment Facility (MTF) participant; O=outpatient MTF participant; I=internet-based participant)

|                                            | Day 0 | Day 3 | Day 7 | Weekly | Day 14 | Day 28 | 3 months | 6 months | 9 months | 12 months |
|--------------------------------------------|-------|-------|-------|--------|--------|--------|----------|----------|----------|-----------|
| Virology                                   |       |       |       |        |        |        |          |          |          |           |
| Nasal-throat-and/or oral swab <sup>+</sup> | H+O   | H     | H     | H      | H+O    |        |          |          |          |           |
| Immunology                                 |       |       |       |        |        |        |          |          |          |           |
| Blood <sup>‡</sup>                         | H+O+I | H     | H+O   | H      | H+O    | H+O+I  |          | H+O+I    |          | H+O+I     |
| Clinical characteristics                   |       |       |       |        |        |        |          |          |          |           |
| FLU-PRO plus symptom diary*                | H+O   |       |       |        |        |        |          |          |          |           |
| Survey                                     | H+O+I |       |       |        |        | H+O+I  | H+O+I    | H+O+I    | H+O+I    | H+O+I     |

<sup>+</sup> Swab collected for outpatients or after hospital discharge (for inpatients) may be performed using self-collected nasal or staff-collected NP/OP specimens.

<sup>‡</sup>Blood collection for outpatients or after hospital discharge (for inpatients) may be performed using an at-home volumetric absorptive microsampling (VAMS) device.

\*FLU-PRO plus symptom diary collected daily for 14 days

eTable 2. *ICD-10* categories used to categorize medical diagnoses.

| Group                  | Dx                                          | Included Codes (and subcodes unless otherwise noted)                                                                                                              | Additional details                                                                                                                                                                                                                                                                                                                                                            |
|------------------------|---------------------------------------------|-------------------------------------------------------------------------------------------------------------------------------------------------------------------|-------------------------------------------------------------------------------------------------------------------------------------------------------------------------------------------------------------------------------------------------------------------------------------------------------------------------------------------------------------------------------|
| Cardiovascular Disease | Hypertension                                | I10-I16 Hypertensive diseases<br>H35.03x Hypertensive retinopathy<br>I67.4 Hypertensive encephalopathy                                                            | I10 Essential (primary) hypertension<br>I11 Hypertensive heart disease<br>I12 Hypertensive chronic kidney disease<br>I13 Hypertensive heart and chronic kidney disease<br>I15 Secondary hypertension<br>I16 Hypertensive crisis<br>H35.031-H35.032-H35.033-H35.039 Hypertensive retinopathy<br>I67.4 Hypertensive encephalopathy                                              |
| Cardiovascular Disease | Ischemic Heart Disease                      | I20-I25 Ischemic heart diseases                                                                                                                                   | I20 Angina pectoris<br>I21 Acute myocardial infarction<br>I22 Subsequent ST elev. (STEMI) and non-ST elev. (NSTEMI) myocardial infarction<br>I23 Certain current complications following ST elevation (STEMI) and non-ST elevation (NSTEMI) myocardial infarction (within the 28 day period)<br>I24 Other acute ischemic heart diseases<br>I25 Chronic ischemic heart disease |
| Cardiovascular Disease | Pulmonary Embolism and Deep vein thrombosis | G08 Intracranial and intraspinal thrombosis/phlebitis<br>I26 Pulmonary embolism<br>I80 Phlebitis and thrombophlebitis<br>I82 Other venous embolism and thrombosis |                                                                                                                                                                                                                                                                                                                                                                               |
| Cardiovascular Disease | Myocarditis                                 | I40 Acute myocarditis<br>I51.4 Myocarditis-unspecified                                                                                                            |                                                                                                                                                                                                                                                                                                                                                                               |
| Cardiovascular Disease | Cardiomyopathy                              | I42 Cardiomyopathy                                                                                                                                                |                                                                                                                                                                                                                                                                                                                                                                               |
| Cardiovascular Disease | Atrial fibrillation / flutter               | I48 Atrial fibrillation and flutter                                                                                                                               |                                                                                                                                                                                                                                                                                                                                                                               |

|                        |                                            |                                                                                                                                                                                                     |                                                                                                                                                                                                                                                                                                                                                                                                                                                                                                                          |
|------------------------|--------------------------------------------|-----------------------------------------------------------------------------------------------------------------------------------------------------------------------------------------------------|--------------------------------------------------------------------------------------------------------------------------------------------------------------------------------------------------------------------------------------------------------------------------------------------------------------------------------------------------------------------------------------------------------------------------------------------------------------------------------------------------------------------------|
| Cardiovascular Disease | Cardiac Arrest and Ventricular Tachycardia | I46 Cardiac arrest<br>I47.2 Ventricular tachycardia                                                                                                                                                 |                                                                                                                                                                                                                                                                                                                                                                                                                                                                                                                          |
| Cardiovascular Disease | Heart Failure                              | I50 Heart failure<br>R57.0 Cardiogenic shock                                                                                                                                                        |                                                                                                                                                                                                                                                                                                                                                                                                                                                                                                                          |
| Cardiovascular Disease | Cerebrovascular Disease                    | I60-I69 Cerebrovascular diseases<br>G45 Transient cerebral ischemic attacks and related syndromes<br>G46 Vascular syndromes of brain in cerebrovascular diseases<br>H34 Retinal vascular occlusions | I60 Nontraumatic subarachnoid hemorrhage<br>I61 Nontraumatic intracerebral hemorrhage<br>I62 Other and unspecified nontraumatic intracranial hemorrhage<br>I63 Cerebral infarction<br>I65 Occlusion and stenosis of precerebral arteries-not resulting in cerebral infarction<br>I66 Occlusion and stenosis of cerebral arteries-not resulting in cerebral infarction<br>I67 Other cerebrovascular diseases<br>I68 Cerebrovascular disorders in diseases classified elsewhere<br>I69 Sequelae of cerebrovascular disease |
| Pulmonary              | Pneumonia-Viral                            | J12 Viral pneumonia-not elsewhere classified                                                                                                                                                        |                                                                                                                                                                                                                                                                                                                                                                                                                                                                                                                          |
| Pulmonary              | Pneumonia-Bacterial                        | J13 Pneumonia due to Streptococcus pneumoniae<br>J14 Pneumonia due to Hemophilus influenzae<br>J15 Bacterial pneumonia-not elsewhere classified                                                     |                                                                                                                                                                                                                                                                                                                                                                                                                                                                                                                          |
| Pulmonary              | Pneumonia-NOS                              | J16 Pneumonia due to other infectious organisms-not elsewhere classified<br>J17 Pneumonia in diseases classified elsewhere<br>J18 Pneumonia-unspecified organism                                    |                                                                                                                                                                                                                                                                                                                                                                                                                                                                                                                          |
| Pulmonary              | Asthma                                     | J45 Asthma                                                                                                                                                                                          |                                                                                                                                                                                                                                                                                                                                                                                                                                                                                                                          |
| Pulmonary              | Obstructive Lung Disease                   | J41-J44-J47 Chronic lower respiratory diseases                                                                                                                                                      | [note: J40 excluded as acute/chronic not specified; n=3]<br>J41 Simple and mucopurulent chronic bronchitis<br>J42 Unspecified chronic bronchitis<br>J43 Emphysema<br>J44 Other chronic obstructive pulmonary disease<br>J47 Bronchiectasis<br>[note: J98.8 Other specified respiratory disorders not included due to acute viral infection; n=7]                                                                                                                                                                         |

|           |                                                             |                                                                                                                                                                                                                     |                                                                                                                                                                                                                                                                                                                                                                                                                                                                                                            |
|-----------|-------------------------------------------------------------|---------------------------------------------------------------------------------------------------------------------------------------------------------------------------------------------------------------------|------------------------------------------------------------------------------------------------------------------------------------------------------------------------------------------------------------------------------------------------------------------------------------------------------------------------------------------------------------------------------------------------------------------------------------------------------------------------------------------------------------|
| Pulmonary | Restrictive Lung Disease                                    | J84 Other interstitial pulmonary diseases<br>J98.4 Other disorders of lung                                                                                                                                          |                                                                                                                                                                                                                                                                                                                                                                                                                                                                                                            |
| Pulmonary | Pneumothorax                                                | J93 Pneumothorax and air leak                                                                                                                                                                                       |                                                                                                                                                                                                                                                                                                                                                                                                                                                                                                            |
| Pulmonary | ARDS                                                        | J80 Acute respiratory distress syndrome                                                                                                                                                                             |                                                                                                                                                                                                                                                                                                                                                                                                                                                                                                            |
| Neurology | Meningitis and Encephalitis                                 | G00-G05 Meningitis and Encephalitis                                                                                                                                                                                 | G00 Bacterial meningitis-not elsewhere classified<br>G01 Meningitis in bacterial diseases classified elsewhere<br>G02 Meningitis in other infectious and parasitic diseases classified elsewhere<br>G03 Meningitis due to other and unspecified causes<br>G04 Encephalitis-myelitis and encephalomyelitis<br>G05 Encephalitis-myelitis and encephalomyelitis in diseases classified elsewhere                                                                                                              |
| Neurology | Seizure Disorder                                            | G40 Epilepsy and recurrent seizures                                                                                                                                                                                 |                                                                                                                                                                                                                                                                                                                                                                                                                                                                                                            |
| Neurology | Headache Disorder                                           | G43 Migraine<br>G44 Other headache syndromes                                                                                                                                                                        |                                                                                                                                                                                                                                                                                                                                                                                                                                                                                                            |
| Neurology | Sleep Disorder                                              | G47 Sleep disorders (except G47.3)                                                                                                                                                                                  | G47.3 Sleep apnea (n=89) excluded                                                                                                                                                                                                                                                                                                                                                                                                                                                                          |
| Neurology | Pain Syndrome NOS                                           | G89 Pain-not elsewhere classified                                                                                                                                                                                   |                                                                                                                                                                                                                                                                                                                                                                                                                                                                                                            |
| Neurology | Acute CNS signs and symptoms (not intoxication/ withdrawal) | F05 Delirium due to known physiological condition<br>F09 Unspecified mental disorder due to known physiological condition<br>R40-R46 Symptoms and signs involving cognition-perception-emotional state and behavior | F05 Delirium due to known physiological condition<br>F09 Unspecified mental disorder due to known physiological condition<br>R40 Somnolence-stupor and coma<br>R41 Other symptoms and signs involving cognitive functions and awareness<br>R42 Dizziness and giddiness<br>R43 Disturbances of smell and taste<br>R44 Other symptoms and signs involving general sensations and perceptions<br>R45 Symptoms and signs involving emotional state<br>R46 Symptoms and signs involving appearance and behavior |
| Neurology | Postviral Fatigue or Encephalopathy                         | G93.3 Postviral fatigue syndrome<br>G93.4 Other and unspecified encephalopathy                                                                                                                                      |                                                                                                                                                                                                                                                                                                                                                                                                                                                                                                            |

|               |                               |                                                                                                                                                                               |                                                                                                                                                                                                                                                                                                                                                                                                                                                                                                                                                                                                                                                                                                                                                                |
|---------------|-------------------------------|-------------------------------------------------------------------------------------------------------------------------------------------------------------------------------|----------------------------------------------------------------------------------------------------------------------------------------------------------------------------------------------------------------------------------------------------------------------------------------------------------------------------------------------------------------------------------------------------------------------------------------------------------------------------------------------------------------------------------------------------------------------------------------------------------------------------------------------------------------------------------------------------------------------------------------------------------------|
| Neurology     | Dementia                      | F01 Vascular dementia<br>F02 Dementia in other diseases classified elsewhere<br>F03 Unspecified dementia<br>G30 Alzheimer's disease<br>G31 Other degenerative diseases of CNS |                                                                                                                                                                                                                                                                                                                                                                                                                                                                                                                                                                                                                                                                                                                                                                |
| Neurology     | Movement Disorders            | G20-G26 Extrapyrarnidal and movement disorders                                                                                                                                | G20 Parkinson's disease<br>G21 Secondary parkinsonism<br>G23 Other degenerative diseases of basal ganglia<br>G24 Dystonia<br>G25 Other extrapyramidal and movement disorders<br>G26 Extrapyrarnidal and movement disorders in diseases classified elsewhere                                                                                                                                                                                                                                                                                                                                                                                                                                                                                                    |
| Neurology     | Neuropathies                  | G50-G65 Polyneuropathies and other disorders of the peripheral nervous system                                                                                                 | G50 Disorders of trigeminal nerve<br>G51 Facial nerve disorders<br>G52 Disorders of other cranial nerves<br>G53 Cranial nerve disorders in diseases classified elsewhere<br>G54 Nerve root and plexus disorders<br>G55 Nerve root and plexus compressions in diseases classified elsewhere<br>G56 Mononeuropathies of upper limb<br>G57 Mononeuropathies of lower limb<br>G58 Other mononeuropathies<br>G59 Mononeuropathy in diseases classified elsewhere<br>G60 Hereditary and idiopathic neuropathy<br>G61 Inflammatory polyneuropathy<br>G62 Other and unspecified polyneuropathies<br>G63 Polyneuropathy in diseases classified elsewhere<br>G64 Other disorders of peripheral nervous system<br>G65 Sequelae of inflammatory and toxic polyneuropathies |
| Mental Health | Depression and Mood Disorders | F30-F39 Mood [affective] disorders                                                                                                                                            | F30 Manic episode<br>F31 Bipolar disorder<br>F32 Major depressive disorder-single episode<br>F33 Major depressive disorder-recurrent                                                                                                                                                                                                                                                                                                                                                                                                                                                                                                                                                                                                                           |



|               |                                  |                                                                                                                                                                                                                                                                                               |                                                                                                                                                                                                                                                                                                                                                                  |
|---------------|----------------------------------|-----------------------------------------------------------------------------------------------------------------------------------------------------------------------------------------------------------------------------------------------------------------------------------------------|------------------------------------------------------------------------------------------------------------------------------------------------------------------------------------------------------------------------------------------------------------------------------------------------------------------------------------------------------------------|
|               |                                  |                                                                                                                                                                                                                                                                                               | F34 Persistent mood [affective] disorders<br>F39 Unspecified mood [affective] disorder                                                                                                                                                                                                                                                                           |
| Mental Health | Anxiety and Somatoform Disorders | F41-F48 Anxiety-dissociative-stress-related-and somatoform disorders                                                                                                                                                                                                                          | F41 Other anxiety disorders<br>F42 Obsessive-compulsive disorder<br>F43 Reaction to severe stress-and adjustment disorders<br>F44 Dissociative and conversion disorders<br>F45 Somatoform disorders<br>F48 Other nonpsychotic mental disorders                                                                                                                   |
| Endocrine     | Diabetes                         | E08-E13 Diabetes mellitus                                                                                                                                                                                                                                                                     | E08 Diabetes mellitus due to underlying condition<br>E09 Drug or chemical induced diabetes mellitus<br>E10 Type 1 diabetes mellitus<br>E11 Type 2 diabetes mellitus<br>E13 Other specified diabetes mellitus                                                                                                                                                     |
| Liver         | Liver Disease-Chronic            | K70-K77 Diseases of liver<br>Z94.4 Liver transplant status                                                                                                                                                                                                                                    | K70 Alcoholic liver disease<br>K71 Toxic liver disease<br>K72 Hepatic failure-not elsewhere classified<br>K73 Chronic hepatitis-not elsewhere classified<br>K74 Fibrosis and cirrhosis of liver<br>K75 Other inflammatory liver diseases<br>K76 Other diseases of liver<br>K77 Liver disorders in diseases classified elsewhere<br>Z94.4 Liver transplant status |
| Renal         | Acute Kidney Failure             | N17 Acute kidney failure                                                                                                                                                                                                                                                                      |                                                                                                                                                                                                                                                                                                                                                                  |
| Renal         | Chronic Kidney Disease           | I12 Hypertensive chronic kidney disease<br>I13 Hypertensive heart and chronic kidney disease<br>N18 Chronic kidney disease (CKD)<br>N19 Unspecified kidney failure<br>Z49 Encounter for care involving renal dialysis<br>Z94.0 Kidney transplant status<br>Z99.2 Dependence on renal dialysis |                                                                                                                                                                                                                                                                                                                                                                  |
| Other         | Bacteremia                       | R78.81 Bacteremia                                                                                                                                                                                                                                                                             |                                                                                                                                                                                                                                                                                                                                                                  |

|       |                   |                                                                                                                                                                                                                                             |  |
|-------|-------------------|---------------------------------------------------------------------------------------------------------------------------------------------------------------------------------------------------------------------------------------------|--|
| Other | DIC/ Coagulopathy | D65 Disseminated intravascular coagulation<br>[defibrination syndrome]<br>D68 Other coagulation defects<br>D69.3 Immune thrombocytopenic purpura<br>D69.8 Other specified hemorrhagic conditions<br>D69.9 Hemorrhagic condition-unspecified |  |
|-------|-------------------|---------------------------------------------------------------------------------------------------------------------------------------------------------------------------------------------------------------------------------------------|--|

eTable 3. Risk of organ-specific diagnoses derived from generalized linear models run using each organ system category as the outcome. The models included time in 30-day periods around symptom onset, all variables listed in table, as well as a random effect for the participant.

| Variable                                                 | Pulmonary          |         | Renal               |         | Liver            |         | Cardiovascular disease |         | Diabetes            |         | Neurology        |         | Mental health    |         |
|----------------------------------------------------------|--------------------|---------|---------------------|---------|------------------|---------|------------------------|---------|---------------------|---------|------------------|---------|------------------|---------|
|                                                          | Risk ratio         | p-value | Risk ratio          | p-value | Risk ratio       | p-value | Risk ratio             | p-value | Risk ratio          | p-value | Risk ratio       | p-value | Risk ratio       | p-value |
| 61-90 days pre-onset                                     | Ref                |         | Ref                 |         | Ref              |         | Ref                    |         | Ref                 |         | Ref              |         | Ref              |         |
| 31-60 days pre-onset                                     | 1.41 (0.98-2.03)   | 0.07    | 1.50 (0.67-3.34)    | 0.32    | 1.00 (0.38-2.66) | 1.00    | 0.84 (0.59-1.17)       | 0.30    | 1.26 (0.86-1.86)    | 0.24    | 1.16 (0.92-1.47) | 0.21    | 0.95 (0.74-1.21) | 0.66    |
| 1-30 days pre-onset                                      | 1.20 (0.82-1.76)   | 0.34    | 0.90 (0.37-2.21)    | 0.82    | 0.88 (0.32-2.41) | 0.80    | 1.01 (0.73-1.40)       | 0.93    | 1.30 (0.89-1.92)    | 0.18    | 1.03 (0.81-1.31) | 0.81    | 1.00 (0.79-1.27) | 1.00    |
| 0-30 days post-onset                                     | 11.33 (8.42-15.26) | 0.00    | 6.96 (3.56-13.62)   | 0.00    | 3.95 (1.80-8.66) | 0.00    | 2.89 (2.20-3.79)       | 0.00    | 2.69 (1.91-3.79)    | 0.00    | 2.24 (1.81-2.78) | 0.00    | 1.40 (1.11-1.77) | 0.00    |
| 31-60 days post-onset                                    | 3.84 (2.78-5.29)   | 0.00    | 1.43 (0.63-3.25)    | 0.39    | 1.05 (0.39-2.82) | 0.92    | 1.48 (1.09-2.00)       | 0.01    | 1.29 (0.88-1.90)    | 0.20    | 1.35 (1.07-1.71) | 0.01    | 1.20 (0.95-1.53) | 0.13    |
| 61-90 days post-onset                                    | 2.76 (1.97-3.86)   | 0.00    | 1.33 (0.58-3.05)    | 0.50    | 0.92 (0.33-2.55) | 0.87    | 1.48 (1.09-2.00)       | 0.01    | 1.70 (1.18-2.45)    | 0.00    | 1.50 (1.19-1.90) | 0.00    | 1.19 (0.93-1.51) | 0.16    |
| 91-120 days post-onset                                   | 2.49 (1.77-3.50)   | 0.00    | 1.33 (0.58-3.05)    | 0.50    | 1.32 (0.52-3.35) | 0.57    | 1.38 (1.02-1.88)       | 0.04    | 1.46 (1.00-2.13)    | 0.05    | 1.27 (1.00-1.61) | 0.05    | 1.25 (0.98-1.58) | 0.07    |
| 121-150 days post-onset                                  | 1.86 (1.30-2.66)   | 0.00    | 0.72 (0.27-1.89)    | 0.50    | 0.53 (0.16-1.75) | 0.30    | 1.09 (0.79-1.51)       | 0.58    | 1.33 (0.91-1.96)    | 0.14    | 1.34 (1.06-1.70) | 0.02    | 1.24 (0.98-1.57) | 0.08    |
| 151-180 days post-onset                                  | 2.00 (1.40-2.84)   | 0.00    | 1.23 (0.53-2.86)    | 0.63    | 1.45 (0.58-3.62) | 0.43    | 1.27 (0.93-1.74)       | 0.13    | 1.46 (1.00-2.13)    | 0.05    | 1.29 (1.02-1.64) | 0.04    | 1.28 (1.01-1.62) | 0.04    |
| Unvaccinated prior to infection                          | 1.72 (1.32-2.27)   | 0.00    | 1.30 (0.46-3.70)    | 0.62    | 2.22 (0.52-10.0) | 0.28    | 0.99 (0.69-1.41)       | 0.95    | 0.90 (0.54-1.52)    | 0.70    | 1.27 (1.00-1.59) | 0.05    | 1.11 (0.86-1.43) | 0.43    |
| Delta variant period (July 1, 2021 to December 31, 2021) | 1.28 (1.01-1.61)   | 0.04    | 0.66 (0.25-1.75)    | 0.41    | 0.57 (0.20-1.59) | 0.28    | 1.08 (0.76-1.52)       | 0.68    | 0.57 (0.32-1.02)    | 0.06    | 1.36 (1.06-1.73) | 0.02    | 1.53 (1.07-2.19) | 0.02    |
| Hospitalized for COVID-19                                | 3.26 (2.67-3.97)   | 0.00    | 9.60 (4.76-19.34)   | 0.00    | 4.31 (2.21-8.41) | 0.00    | 3.38 (2.53-4.51)       | 0.00    | 4.08 (2.53-6.57)    | 0.00    | 1.62 (1.21-2.16) | 0.00    | 1.71 (1.07-2.72) | 0.03    |
| Age group: 18-44                                         | Ref                |         | Ref                 |         | Ref              |         | Ref                    |         | Ref                 |         | Ref              |         | Ref              |         |
| Age group: 45-64                                         | 1.39 (1.16-1.67)   | 0.00    | 5.03 (2.28-11.09)   | 0.00    | 3.67 (1.88-7.16) | 0.00    | 5.30 (3.98-7.05)       | 0.00    | 5.21 (3.29-8.25)    | 0.00    | 1.17 (0.94-1.47) | 0.17    | 0.78 (0.55-1.12) | 0.18    |
| Age group: 65+                                           | 2.61 (2.02-3.38)   | 0.00    | 30.15 (11.99-75.84) | 0.00    | 2.23 (0.79-6.24) | 0.13    | 14.70 (9.97-21.68)     | 0.00    | 20.49 (10.91-38.50) | 0.00    | 1.09 (0.73-1.61) | 0.69    | 0.45 (0.22-0.89) | 0.02    |
| Sex: Female                                              | 1.26 (1.07-1.47)   | 0.00    | 0.80 (0.42-1.55)    | 0.51    | 1.27 (0.70-2.29) | 0.43    | 0.98 (0.77-1.26)       | 0.90    | 3.40 (2.26-5.10)    | 0.00    | 1.43 (1.17-1.73) | 0.00    | 2.90 (2.13-3.94) | 0.00    |
| BMI category: Underweight/normal                         | Ref                |         | Ref                 |         | Ref              |         | Ref                    |         | Ref                 |         | Ref              |         | Ref              |         |

|                              |                   |      |                   |      |                   |      |                   |      |                   |      |                   |      |                   |      |
|------------------------------|-------------------|------|-------------------|------|-------------------|------|-------------------|------|-------------------|------|-------------------|------|-------------------|------|
| BMI category: Overweight     | 1.13 (0.90-1.41)  | 0.30 | 2.25 (0.72-7.01)  | 0.16 | 0.88 (0.32-2.42)  | 0.81 | 1.41 (0.96-2.08)  | 0.08 | 1.32 (0.71-2.46)  | 0.38 | 1.07 (0.82-1.39)  | 0.62 | 1.89 (1.24-2.87)  | 0.00 |
| BMI category: Obese          | 1.52 (1.20-1.93)  | 0.00 | 2.81 (0.88-8.96)  | 0.08 | 2.05 (0.77-5.45)  | 0.15 | 2.06 (1.38-3.09)  | 0.00 | 2.97 (1.57-5.62)  | 0.00 | 1.33 (1.00-1.77)  | 0.05 | 2.61 (1.65-4.13)  | 0.00 |
| BMI category: Severely obese | 1.61 (1.24, 2.10) | 0.00 | 2.03 (0.59, 6.94) | 0.26 | 3.06 (1.13, 8.24) | 0.03 | 3.02 (1.97, 4.64) | 0.00 | 3.99 (2.03, 7.81) | 0.00 | 1.34 (0.96, 1.88) | 0.09 | 2.41 (1.41, 4.11) | 0.00 |

eTable 4. Comparison of those who were and were not included in the analysis based on availability of survey and Military Health System Data Repository data. Statistical comparisons are Pearson’s Chi squared tests.

|                                                | Not included<br>(N=657) | Included<br>(N=1832) | Total<br>(N=2489) | p<br>value |
|------------------------------------------------|-------------------------|----------------------|-------------------|------------|
| <b>Age group</b>                               |                         |                      |                   | <<br>0.001 |
| 18-44                                          | 486 (74.0%)             | 1226 (66.9%)         | 1712<br>(68.8%)   |            |
| 45-64                                          | 123 (18.7%)             | 487 (26.6%)          | 610 (24.5%)       |            |
| 65+                                            | 48 (7.3%)               | 119 (6.5%)           | 167 (6.7%)        |            |
| <b>Male</b>                                    |                         |                      |                   | 0.010      |
| Female                                         | 219 (33.3%)             | 714 (39.0%)          | 933 (37.5%)       |            |
| Male                                           | 438 (66.7%)             | 1118 (61.0%)         | 1556<br>(62.5%)   |            |
| <b>Race/ethnicity</b>                          |                         |                      |                   | 0.003      |
| Asian                                          | 33 (5.0%)               | 78 (4.3%)            | 111 (4.5%)        |            |
| Black                                          | 93 (14.2%)              | 206 (11.2%)          | 299 (12.0%)       |            |
| Hispanic or Latino                             | 168 (25.6%)             | 384 (21.0%)          | 552 (22.2%)       |            |
| Other                                          | 38 (5.8%)               | 154 (8.4%)           | 192 (7.7%)        |            |
| White                                          | 325 (49.5%)             | 1010 (55.1%)         | 1335<br>(53.6%)   |            |
| <b>BMI category</b>                            |                         |                      |                   | 0.650      |
| Under/normal weight                            | 157 (23.9%)             | 399 (21.8%)          | 556 (22.3%)       |            |
| Overweight                                     | 269 (40.9%)             | 760 (41.5%)          | 1029<br>(41.3%)   |            |
| Obese                                          | 153 (23.3%)             | 432 (23.6%)          | 585 (23.5%)       |            |
| Severely obese                                 | 78 (11.9%)              | 241 (13.2%)          | 319 (12.8%)       |            |
| <b>Charlson Comorbidity Index<br/>category</b> |                         |                      |                   | 0.094      |

|                                                           |             |              |                 |       |
|-----------------------------------------------------------|-------------|--------------|-----------------|-------|
| 0                                                         | 479 (72.9%) | 1290 (70.4%) | 1769<br>(71.1%) |       |
| 1-2                                                       | 115 (17.5%) | 373 (20.4%)  | 488 (19.6%)     |       |
| 3-4                                                       | 29 (4.4%)   | 102 (5.6%)   | 131 (5.3%)      |       |
| 5+                                                        | 34 (5.2%)   | 67 (3.7%)    | 101 (4.1%)      |       |
| <b>Military status</b>                                    |             |              |                 | 0.159 |
| Active duty                                               | 431 (65.6%) | 1126 (61.5%) | 1557<br>(62.6%) |       |
| Dependent                                                 | 126 (19.2%) | 383 (20.9%)  | 509 (20.4%)     |       |
| Retired military                                          | 100 (15.2%) | 323 (17.6%)  | 423 (17.0%)     |       |
| <b>Infected during Delta period<br/>(7/1/21-12/31/21)</b> |             |              |                 | 0.574 |
| Pre-Delta                                                 | 476 (72.5%) | 1348 (73.6%) | 1824<br>(73.3%) |       |
| Delta                                                     | 181 (27.5%) | 484 (26.4%)  | 665 (26.7%)     |       |
| <b>Hospitalization status</b>                             |             |              |                 | 0.005 |
| Hospitalized                                              | 114 (17.4%) | 236 (12.9%)  | 350 (14.1%)     |       |
| Outpatient                                                | 543 (82.6%) | 1596 (87.1%) | 2139<br>(85.9%) |       |
