# Supplementary material for: Persistent COVID-19 Symptoms at 6 Months After Onset and the Role of Vaccination Before or After SARS-CoV-2 Infection
Source: PubMed Central journal article supplement (PMC9857077; doi:10.1001/jamanetworkopen.2022.51360), 2023-01-18
Supplement: jamanetwopen-e2251360-s002.pdf [file jamanetwopen-e2251360-s002.pdf]

\*First name, last name, and suffix (if applicable) are required and will appear in PubMed.

| <b>*Group Name(s): Epidemiology, Immunology, and Clinical Characteristics of Emerging Infectious Diseases With Pandemic Potential (EPICC) COVID-19 Cohort Study Group</b> |                   |                              |                  |                                                      |                                          |                                                         |                                                                                            |
|---------------------------------------------------------------------------------------------------------------------------------------------------------------------------|-------------------|------------------------------|------------------|------------------------------------------------------|------------------------------------------|---------------------------------------------------------|--------------------------------------------------------------------------------------------|
| <b>*First Name and Middle Initial(s)</b>                                                                                                                                  | <b>*Last Name</b> | <b>*Suffix (eg, Jr, III)</b> | Academic Degrees | Institution                                          | Location (city, state/province, country) | Role or Contribution, eg, chair, principal investigator | Group (if more than 1 Group listed in the byline) and/or Subgroup (eg, Steering Committee) |
| Terry                                                                                                                                                                     | Merritt           |                              |                  | Brooke Army Medical Center                           | Fort Sam Houston, TX                     |                                                         | EPICC COVID-19 Cohort Study Group                                                          |
| Susan                                                                                                                                                                     | Chambers          |                              |                  | Madigan Army Medical Center                          | Joint Base Lewis McChord, WA             |                                                         | EPICC COVID-19 Cohort Study Group                                                          |
| Cristin                                                                                                                                                                   | Mount             |                              |                  | Madigan Army Medical Center                          | Joint Base Lewis McChord, WA             |                                                         | EPICC COVID-19 Cohort Study Group                                                          |
| Michael                                                                                                                                                                   | Stein             |                              |                  | Madigan Army Medical Center                          | Joint Base Lewis McChord, WA             |                                                         | EPICC COVID-19 Cohort Study Group                                                          |
| Catherine                                                                                                                                                                 | Uyehara           |                              |                  | Tripler Army Medical Center                          | Honolulu, HI                             |                                                         | EPICC COVID-19 Cohort Study Group                                                          |
| Heidi                                                                                                                                                                     | Adams             |                              |                  | Uniformed Services University of the Health Sciences | Bethesda, MD                             |                                                         | EPICC COVID-19 Cohort Study Group                                                          |
| Patrick                                                                                                                                                                   | Hickey            |                              |                  | Uniformed Services University of the Health Sciences | Bethesda, MD                             |                                                         | EPICC COVID-19 Cohort Study Group                                                          |
| Edward                                                                                                                                                                    | Parmelee          |                              |                  | Uniformed Services University of the Health Sciences | Bethesda, MD                             |                                                         | EPICC COVID-19 Cohort Study Group                                                          |
| Mark                                                                                                                                                                      | Fritschlanski     |                              |                  | Uniformed Services University of the Health Sciences | Bethesda, MD                             |                                                         | EPICC COVID-19 Cohort Study Group                                                          |
| Tim                                                                                                                                                                       | Chao              |                              |                  | United States Air Force School of Aerospace Medicine | Dayton, OH                               |                                                         | EPICC COVID-19 Cohort Study Group                                                          |
| Richard                                                                                                                                                                   | Chapleau          |                              |                  | United States Air Force School of Aerospace Medicine | Dayton, OH                               |                                                         | EPICC COVID-19 Cohort Study Group                                                          |
| Monica                                                                                                                                                                    | Christian         |                              |                  | United States Air Force School of Aerospace Medicine | Dayton, OH                               |                                                         | EPICC COVID-19 Cohort Study Group                                                          |
| Kelsey                                                                                                                                                                    | Lanter            |                              |                  | United States Air Force School of Aerospace Medicine | Dayton, OH                               |                                                         | EPICC COVID-19 Cohort Study Group                                                          |
| Jennifer                                                                                                                                                                  | Meyer             |                              |                  | United States Air Force School of Aerospace Medicine | Dayton, OH                               |                                                         | EPICC COVID-19 Cohort Study Group                                                          |

Supplemental Online Content: Nonauthor Collaborators

\*First name, last name, and suffix (if applicable) are required and will appear in PubMed.

| <b>*First Name and Middle Initial(s)</b> | <b>*Last Name</b> | <b>*Suffix (eg, Jr, III)</b> | Academic Degrees | Institution                | Location (city, state/province, country) | Role or Contribution, eg, chair, principal investigator | Group (if more than 1 Group listed in the byline) and/or Subgroup (eg, Steering Committee) |
|------------------------------------------|-------------------|------------------------------|------------------|----------------------------|------------------------------------------|---------------------------------------------------------|--------------------------------------------------------------------------------------------|
| John                                     | Iskander          |                              |                  | United States Coast Guard  | Washington, DC                           |                                                         | EPICC COVID-19 Cohort Study Group                                                          |
| Kathryn                                  | Lago              |                              |                  | Womack Army Medical Center | Fort Bragg, NC                           |                                                         | EPICC COVID-19 Cohort Study Group                                                          |
