# Supplementary material for: Persistent COVID-19 Symptoms at 6 Months After Onset and the Role of Vaccination Before or After SARS-CoV-2 Infection
Source: PubMed Central journal article supplement (PMC9857077; doi:10.1001/jamanetworkopen.2022.51360), 2023-01-18
Supplement: jamanetwopen-e2251360-s003.pdf [file jamanetwopen-e2251360-s003.pdf]

## Data Sharing Statement

Richard. Persistent COVID-19 Symptoms at 6 Months After Onset and the Role of Vaccination Before or After SARS-CoV-2 Infection. *JAMA Netw Open*. Published January 18, 2023.  
doi:10.1001/jamanetworkopen.2022.51360

### Data

**Data available:** No
